# Supplementary material for: Pretreating cellulases with hydrophobins for improving bioconversion of cellulose: an experimental and computational study
Source: Royal Society of Chemistry journal article supplement (doi:10.1039/c6gc02694j), 2016-01-01
Supplement: c6gc02694j1.pdf [file c6gc02694j1.pdf]

Electronic Supplementary Information for:

# Pretreating cellulases with hydrophobins for improving bioconversion of cellulose: An experimental and computational study

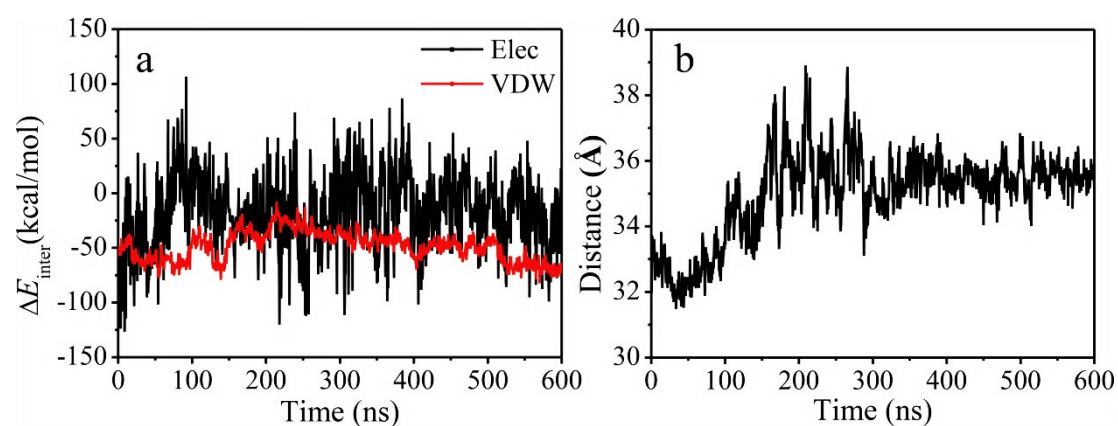

Figure S1 Interaction energy (a), center-of-mass distance (b) between CBHI and HFBII.
